# Supplementary material for: Evolutionary Divergence of Duplicated Hsf Genes in Populus
Source: MDPI journal article supplement (doi:10.3390/cells8050438), 2019-05-10

Supporting Information

Article title: **Evolutionary divergence of duplicated *Hsf* genes in *Populus***

Authors: Bobin Liu, Jianjun Hu, Jin Zhang

The following Supporting Information is available for this article:

**Figure S1** 3D structures comparison of paralogous pairs from PtHsf family.

**Figure S2** Two paralogous pairs protein sequence alignment analysis.

**Table S1** Enrichment analysis of *PtHsfs* co-expressed genes. (included as a separate excel file)

**Table S2** List of transcription factor genes co-expressed with *PtHsfs*. (included as a separate excel file)

**Table S3** SNP information of *PtHsf* gene family. (included as a separate excel file)

**Table S4** protein sequence similarity in Figure 6B. (included as a separate excel file)

**Figure S1** 3D structures comparison of paralogous pairs from PtHsf family

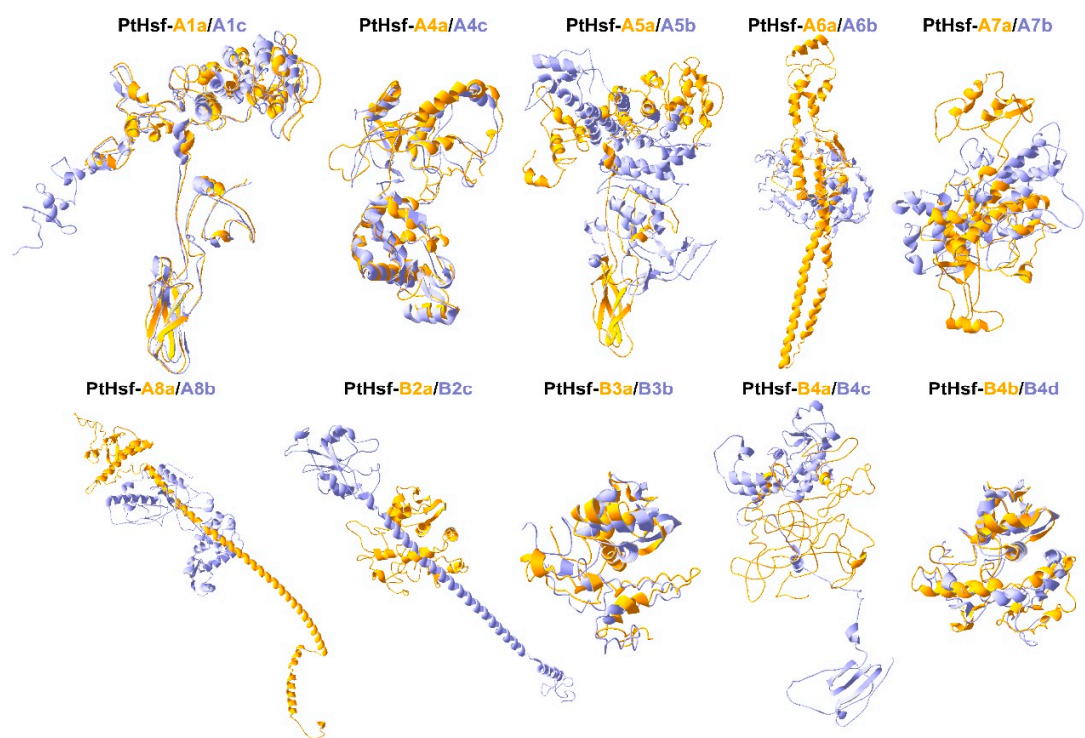

**Figure S2 Two paralogous pairs protein sequence alignment analysis**

(A) PtHsf-B2a and PtHsf-B2c protein sequence alignment. Blue arrows represent mutation to Pro or Gly mutation.

(B) PtHsf-B8a and PtHsf-B8b protein sequence alignment. Blue arrows represent mutation to Pro or Gly mutation.

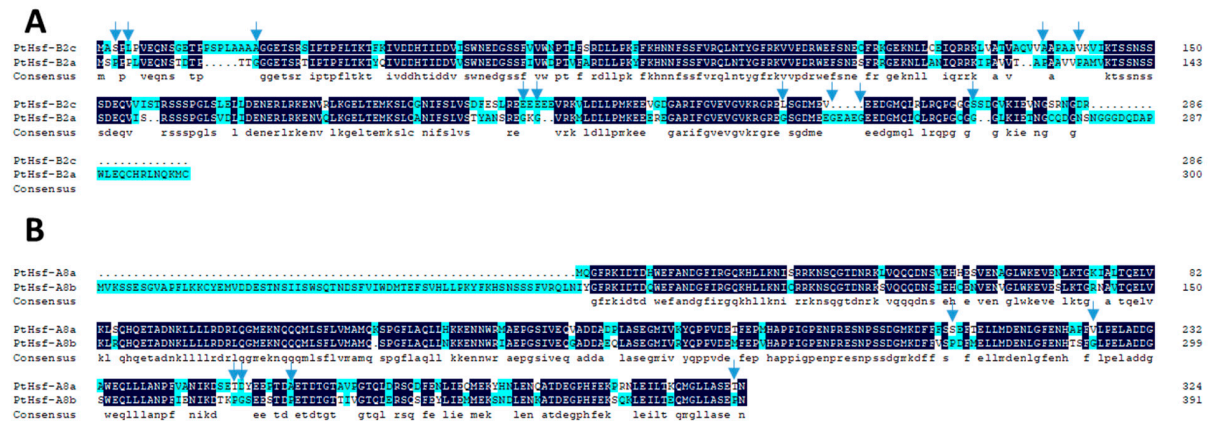

Supplement: s1 [file s1]
